# Supplementary material
Source: publisher figshare collection journal article supplement (https://frontiersin.figshare.com/ndownloader/files/14131565)
Supplement: Supplementary file [file 14131565]

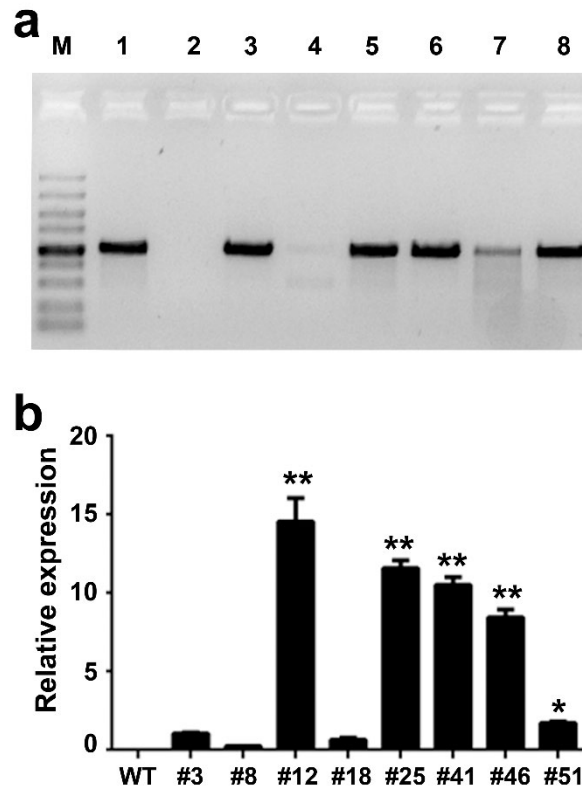

**Fig.S1 Molecular identification of *GmWRKY16* transgenic Arabidopsis lines**

**a.** PCR identification of *GmWRKY16* transgenic Arabidopsis plants. **b.** qRT-PCR identification of *GmWRKY16* transgenic Arabidopsis lines. The three-week-old seedlings were used to perform the molecular identification of *GmWRKY16* transgenic Arabidopsis plant and lines. M: DNA marker; Lane 1-8: PCR products with different DNA templates set as *GmWRKY16*-pLB plasmid for lane 1, ddH<sub>2</sub>O for lane 2, genomic DNA from randomly selected *GmWRKY16* transgenic Arabidopsis plants for lane 3-8. WT: wild type; #3, 8, 12, 18, 25, 41, 46, and 51: *GmWRKY16* transgenic Arabidopsis lines of T<sub>3</sub> generation.
